# Supplementary material for: Effects of mHealth on the psychosocial health of pregnant women and mothers: a systematic review
Source: HighWire-hosted journal article supplement (doi:10.1136/bmjopen-2021-056807), 2022-02-01
Supplement: bmjopen-2021-056807supp005_data_supplement.pdf [file bmjopen-2021-056807supp005_data_supplement.pdf]

**Supplementary File 5.** List of excluded studies

| <b>Reference</b>      | <b>Reasons for exclusion</b>                      |
|-----------------------|---------------------------------------------------|
| 1. Abroms (2017)      | Not psychosocial health outcomes                  |
| 2. Al Hashmi (2017)   | Ph.D. dissertation                                |
| 3. Ashcroft (2017)    | Not psychosocial health outcomes                  |
| 4. Atkinson (2016)    | Not psychosocial health outcomes                  |
| 5. Atnafu (2017)      | Not psychosocial health outcomes                  |
| 6. Baggett (2020)     | Did not meet PICO criteria                        |
| 7. Baggett (2021)     | Did not meet PICO criteria                        |
| 8. Bhat (2018)        | Intervention not exclusively mobile health        |
| 9. Bhati (2014)       | Conference poster                                 |
| 10. Brown (2018)      | Ph.D. dissertation                                |
| 11. Bush (2017)       | Not psychosocial health outcomes                  |
| 12. Castaño (2012)    | Not psychosocial health outcomes                  |
| 13. Crawford (2014)   | Not psychosocial health outcomes                  |
| 14. Dalfra (2009)     | Unclear if exclusively using mobile devices       |
| 15. Dehlendorf (2019) | Not psychosocial health outcomes                  |
| 16. Dodd (2017)       | Not psychosocial health outcomes                  |
| 17. Evans (2015)      | Not psychosocial health outcomes                  |
| 18. Fjeldsoe (2010)   | Not psychosocial health outcomes                  |
| 19. Fletcher (2017)   | Not targeting pregnant women and mothers          |
| 20. Fletcher (2019)   | Not targeting pregnant women and mothers          |
| 21. Forinash (2018)   | Not psychosocial health outcomes                  |
| 22. Gold (2021)       | Unclear if exclusively using mobile devices       |
| 23. Gray (2017)       | Not psychosocial health outcomes                  |
| 24. Hackett (2019)    | Not targeting pregnant women and mothers          |
| 25. Haile (2018)      | Not psychosocial health outcomes                  |
| 26. Hamdani (2021)    | Participants' age did not meet inclusion criteria |
| 27. Henkemans (2018)  | Not targeting pregnant women and mothers          |
| 28. Huberty (2017)    | Not psychosocial health outcomes                  |
| 29. Ilozumba (2018)   | Not psychosocial health outcomes                  |
| 30. Jiskoot (2020)    | Not targeting pregnant women and mothers          |
| 31. Johnson (2017)    | Not psychosocial health outcomes                  |
| 32. Jones (2020)      | Not psychosocial health outcomes                  |
| 33. Kennelly (2018)   | Not psychosocial health outcomes                  |
| 34. Kiani (2021)      | Not psychosocial health outcomes                  |
| 35. Kinuthia (2021)   | Not psychosocial health outcomes                  |
| 36. Kurti (2020)      | Not psychosocial health outcomes                  |
| 37. Ladley (2018)     | Not psychosocial health outcomes                  |
| 38. Ledford (2016)    | Not psychosocial health outcomes                  |
| 39. Letourneau (2015) | Unclear if exclusively using mobile devices       |
| 40. Levine (2021)     | Not psychosocial health outcomes                  |
| 41. Li (2020)         | Not psychosocial health outcomes                  |
| 42. Li (2021)         | Not psychosocial health outcomes                  |
| 43. Lund (2012)       | Not psychosocial health outcomes                  |
| 44. Lund (2014)       | Not psychosocial health outcomes                  |
| 45. MacDonald (2019)  | Not targeting pregnant women and mothers          |

|                         |                                                         |
|-------------------------|---------------------------------------------------------|
| 46. Mascarenhas (2018)  | Participants' age did not meet inclusion criteria       |
| 47. Medhanyie (2015)    | Not targeting pregnant women and mothers                |
| 48. Miremberg (2018)    | Not psychosocial health outcomes                        |
| 49. Mohan (2021)        | Not psychosocial health outcomes                        |
| 50. Moniz (2013)        | Not psychosocial health outcomes                        |
| 51. Moulai (2021)       | Not psychosocial health outcomes                        |
| 52. Murthy (2020)       | Not psychosocial health outcomes                        |
| 53. Naughton (2012)     | Not psychosocial health outcomes                        |
| 54. Naughton (2013)     | Not psychosocial health outcomes                        |
| 55. Naughton (2017)     | Not psychosocial health outcomes                        |
| 56. Ngai (2015)         | Unclear if exclusively using mobile devices             |
| 57. Niederhauser (2015) | Not psychosocial health outcomes                        |
| 58. Odeny (2019)        | Not psychosocial health outcomes                        |
| 59. Pandya (2021)       | Participants' age did not meet inclusion criteria       |
| 60. Perricone (2021)    | Unclear if exclusively using mobile devices             |
| 61. Pollak (2013)       | Not psychosocial health outcomes                        |
| 62. Pollak (2014)       | Not psychosocial health outcomes                        |
| 63. Potzel (2021)       | Not psychosocial health outcomes                        |
| 64. Prasad (2018)       | Ph.D. dissertation                                      |
| 65. Ragesh (2020)       | Not psychosocial health outcomes                        |
| 66. Raj (2021)          | Not targeting pregnant women and mothers                |
| 67. Redman (2017)       | Not psychosocial health outcomes                        |
| 68. Scheepers (2021)    | Not psychosocial health outcomes                        |
| 69. Schoeppe (2020)     | Not psychosocial health outcomes                        |
| 70. Scott (2021)        | Not targeting pregnant women and mothers                |
| 71. Shelus (2017)       | Not psychosocial health outcomes                        |
| 72. Sloan (2017)        | Not psychosocial health outcomes                        |
| 73. Smith (2020)        | Telehealth; unclear if exclusively using mobile devices |
| 74. Soltani (2015)      | Not psychosocial health outcomes                        |
| 75. Stonbraker (2020)   | Not psychosocial health outcomes                        |
| 76. Suryavanshi (2020)  | Not targeting pregnant women and mothers                |
| 77. Sun (2017)          | Not psychosocial health outcomes                        |
| 78. Tinius (2021)       | Not psychosocial health outcomes                        |
| 79. Tombor (2018)       | Not psychosocial health outcomes                        |
| 80. Toohill (2014)      | Unclear if exclusively using mobile devices             |
| 81. Trafford (2020)     | Not psychosocial health outcomes                        |
| 82. Walter (2021)       | Not psychosocial health outcomes                        |
| 83. Willcox (2017)      | Not psychosocial health outcomes                        |
| 84. Wouldes (2021)      | Report/review                                           |
| 85. Wu (2020)           | Not psychosocial health outcomes                        |
| 86. Wu (2021)           | Not psychosocial health outcomes                        |
| 87. Ye (2018)           | Not psychosocial health outcomes                        |
| 88. Yee (2021)          | Not psychosocial health outcomes                        |
| 89. Yudin (2017)        | Not psychosocial health outcomes                        |
| 90. Zakus (2019)        | Not targeting pregnant women and mothers                |
| 91. Zuccolo (2021)      | Study protocol                                          |
