# Supplementary material for: Effects of mHealth on the psychosocial health of pregnant women and mothers: a systematic review
Source: HighWire-hosted journal article supplement (doi:10.1136/bmjopen-2021-056807), 2022-02-01
Supplement: bmjopen-2021-056807supp006_data_supplement.pdf [file bmjopen-2021-056807supp006_data_supplement.pdf]

**Supplementary File 6.** Risk of bias assessment of quasi-experimental studies

(Please indicate whether low, moderate, serious, critical, no information)

| Author (year)           | Selection of participants | Confounding variables | Classification of interventions | Deviations from intended interventions | Missing data | Measurement of the outcome | Selection of the reported result | Overall risk of bias |
|-------------------------|---------------------------|-----------------------|---------------------------------|----------------------------------------|--------------|----------------------------|----------------------------------|----------------------|
| Abroms et al. (2015)    | Moderate                  | No information        | Low                             | Low                                    | Moderate     | Low                        | Low                              | Moderate             |
| Baumel et al. (2018)    | Low                       | Low                   | Low                             | Low                                    | Low          | Low                        | Low                              | Low                  |
| Carissoli et al. (2021) | Low                       | Serious               | Low                             | Low                                    | Serious      | Low                        | Low                              | Serious              |
| Dalton et al. (2018)    | Moderate                  | No information        | Low                             | Low                                    | Moderate     | Serious                    | Low                              | Serious              |
| Fujioka et al. (2012)   | Low                       | Moderate              | Low                             | Low                                    | Low          | Moderate                   | Low                              | Moderate             |
| Globus et al. (2016)    | Low                       | Low                   | Low                             | Low                                    | Low          | Low                        | Low                              | Low                  |
| Goetz et al. (2020)     | Low                       | Low                   | Low                             | Low                                    | Low          | Low                        | Low                              | Low                  |
| Jallo et al. (2017)     | Low                       | Moderate              | Low                             | Moderate                               | Moderate     | Moderate                   | Low                              | Moderate             |
| Kubo et al. (2021)      | Low                       | Moderate              | Low                             | Low                                    | Moderate     | Low                        | Low                              | Moderate             |
| Song et al. (2013)      | Low                       | Moderate              | Low                             | Moderate                               | Low          | Serious                    | Low                              | Serious              |
| Trude et al. (2021)     | Low                       | Low                   | Low                             | Low                                    | Serious      | Low                        | Low                              | Serious              |

## Risk of bias assessment of observational cohort and cross sectional studies

(Please indicate whether yes, no, CD [cannot determine], NA [not applicable], NR [not reported])

| Author                  | 1   | 2   | 3   | 4   | 5   | 6   | 7   | 8   | 9   | 10  | 11  | 12 | 13 | 14  |
|-------------------------|-----|-----|-----|-----|-----|-----|-----|-----|-----|-----|-----|----|----|-----|
| Deave et al. (2019)     | Yes | Yes | Yes | Yes | Yes | Yes | Yes | Yes | Yes | Yes | Yes | No | No | Yes |
| Özkan Şat et al. (2018) | Yes | Yes | Yes | Yes | Yes | Yes | CD  | Yes | Yes | No  | Yes | NR | NA | NR  |

**1:** Was the research question or objective in this paper clearly stated? **2:** Was the study population clearly specified and defined? **3:** Was the participation rate of eligible persons at least 50%? **4:** Were all the subjects selected or recruited from the same or similar populations (including the same time period)? Were inclusion and exclusion criteria for being in the study prespecified and applied uniformly to all participants? **5:** Was a sample size justification, power description, or variance and effect estimates provided? **6:** For the analyses in this paper, were the exposure(s) of interest measured prior to the outcome(s) being measured? **7:** Was the timeframe sufficient so that one could reasonably expect to see an association between exposure and outcome if it existed? **8:** For exposures that can vary in amount or level, did the study examine different levels of the exposure as related to the outcome (e.g., categories of exposure, or exposure measured as continuous variable)? **9:** Were the exposure measures (independent variables) clearly defined, valid, reliable, and implemented consistently across all study participants? **10:** Was the exposure(s) assessed more than once over time? **11:** Were the outcome measures (dependent variables) clearly defined, valid, reliable, and implemented consistently across all study participants? **12:** Were the outcome assessors blinded to the exposure status of participants? **13:** Was loss to follow-up after baseline 20% or less? **14:** Were key potential confounding variables measured and adjusted statistically for their impact on the relationship between exposure(s) and outcome(s)?

## Risk of bias assessment of qualitative studies

(Please indicate whether yes, no, or can't tell)

| Author (Year)            | 1   | 2   | 3   | 4   | 5   | 6   | 7   | 8   | 9   | 10  |
|--------------------------|-----|-----|-----|-----|-----|-----|-----|-----|-----|-----|
| Brown et al. (2014)      | Yes | Yes | Yes | Yes | Yes | CT  | Yes | Yes | Yes | Yes |
| Connor et al. (2018)     | Yes | Yes | Yes | No  | Yes | CT  | Yes | Yes | Yes | Yes |
| Harrington et al. (2019) | Yes | Yes | Yes | No  | Yes | Yes | Yes | Yes | Yes | Yes |

|                          |     |     |     |     |     |     |     |     |     |     |     |     |     |     |     |
|--------------------------|-----|-----|-----|-----|-----|-----|-----|-----|-----|-----|-----|-----|-----|-----|-----|
| Litterbach et al. (2017) | Yes | Yes | Yes | Yes | Yes | Yes | Yes | Yes | Yes | Yes | Yes | Yes | Yes | Yes | Yes |
| Seshu et al. (2021)      | Yes | Yes | Yes | CT  | Yes | CT  | Yes | Yes | Yes | Yes | Yes | Yes | Yes | Yes | Yes |
| Skar et al. (2018)       | Yes | Yes | No  | Yes | Yes | CT  | Yes | Yes | Yes | Yes | Yes | Yes | Yes | Yes | Yes |
| Yee et al. (2020)        | Yes | Yes | Yes | CT  | Yes | CT  | Yes | Yes | Yes | Yes | Yes | Yes | Yes | Yes | Yes |

**1:** Was there a clear statement of the aims of the research? **2:** Is a qualitative methodology appropriate? **3:** Was the research design appropriate to address the aims of the research? **4:** Was the recruitment strategy appropriate to the aims of the research? **5:** Was the data collected in a way that addressed the research issue? **6:** Has the relationship between researcher and participants been adequately considered? **7:** Have ethical issues been taken into consideration? **8:** Was the data analysis sufficiently rigorous? **9:** Is there a clear statement of findings? **10:** How valuable is the research?

### Risk of bias assessment of mixed methods studies (Please indicate whether yes, no, or CT [can't tell])

| Author (Year)            | 1   | 2   | 3   | 4   | 5   | 6   | 7   | 8   | 9   | 10  | 11  | 12  | 13  | 14  | 15  |
|--------------------------|-----|-----|-----|-----|-----|-----|-----|-----|-----|-----|-----|-----|-----|-----|-----|
| Avalos et al. (2020)     | Yes | Yes | Yes | Yes | CT  | Yes | Yes | Yes | Yes | Yes | Yes | Yes | No  | No  | Yes |
| Blackwell et al. (2020)  | Yes | Yes | Yes | Yes | Yes | Yes | Yes | Yes | Yes | Yes | No  | Yes | Yes | No  | Yes |
| Musiimenta et al. (2020) | Yes | Yes | Yes | No  | No  | Yes | Yes | Yes | Yes | Yes | Yes | CT  | No  | CT  | No  |
| Rhodes et al. (2020)     | No  | Yes | Yes | Yes | No  | Yes | No  | Yes | Yes | Yes | No  | Yes | Yes | No  | Yes |
| Seo et al. (2021)        | No  | No  | No  | No  | No  | Yes | Yes | Yes | Yes | Yes | No  | Yes | Yes | No  | Yes |
| Simpson et al. (2021)    | No  | Yes | Yes | Yes | No  | Yes | Yes | Yes | Yes | Yes | No  | Yes | No  | Yes | Yes |
| Stonbraker et al. (2020) | No  | Yes | Yes | Yes | Yes | Yes | Yes | Yes | Yes | Yes | No  | Yes | No  | Yes | Yes |

**1:** Is there an adequate rationale for using a mixed methods design to address the research question? **2:** Are the different components of the study effectively integrated to answer the research question? **3:** Are the outputs of the integration of qualitative and quantitative components adequately interpreted? **4:** Are divergences and inconsistencies between quantitative and qualitative results adequately addressed? **5:** Do the different components of the study adhere to the quality criteria of each tradition of the methods involved? **6:** Is the qualitative approach appropriate to answer the research question? **7:** Are the qualitative data collection methods adequate to address the research question? **8:** Are the findings adequately derived from the data? **9:** Is the interpretation of results sufficiently substantiated by data? **10:** Is there coherence between qualitative data sources, collection, analysis and interpretation? Questions 11-15 depends on whether it involves RCT, non-randomized, or quantitative descriptive studies.
